# Supplementary material for: Deep learning–based reconstruction may improve non-contrast cerebral CT imaging compared to other current reconstruction algorithms
Source: PubMed Central journal article supplement (PMC8270865; doi:10.1007/s00330-020-07668-x), 2021-03-10
Supplement: 330_2020_7668_MOESM1_ESM.pdf [file 330_2020_7668_MOESM1_ESM.pdf]

Figure S1

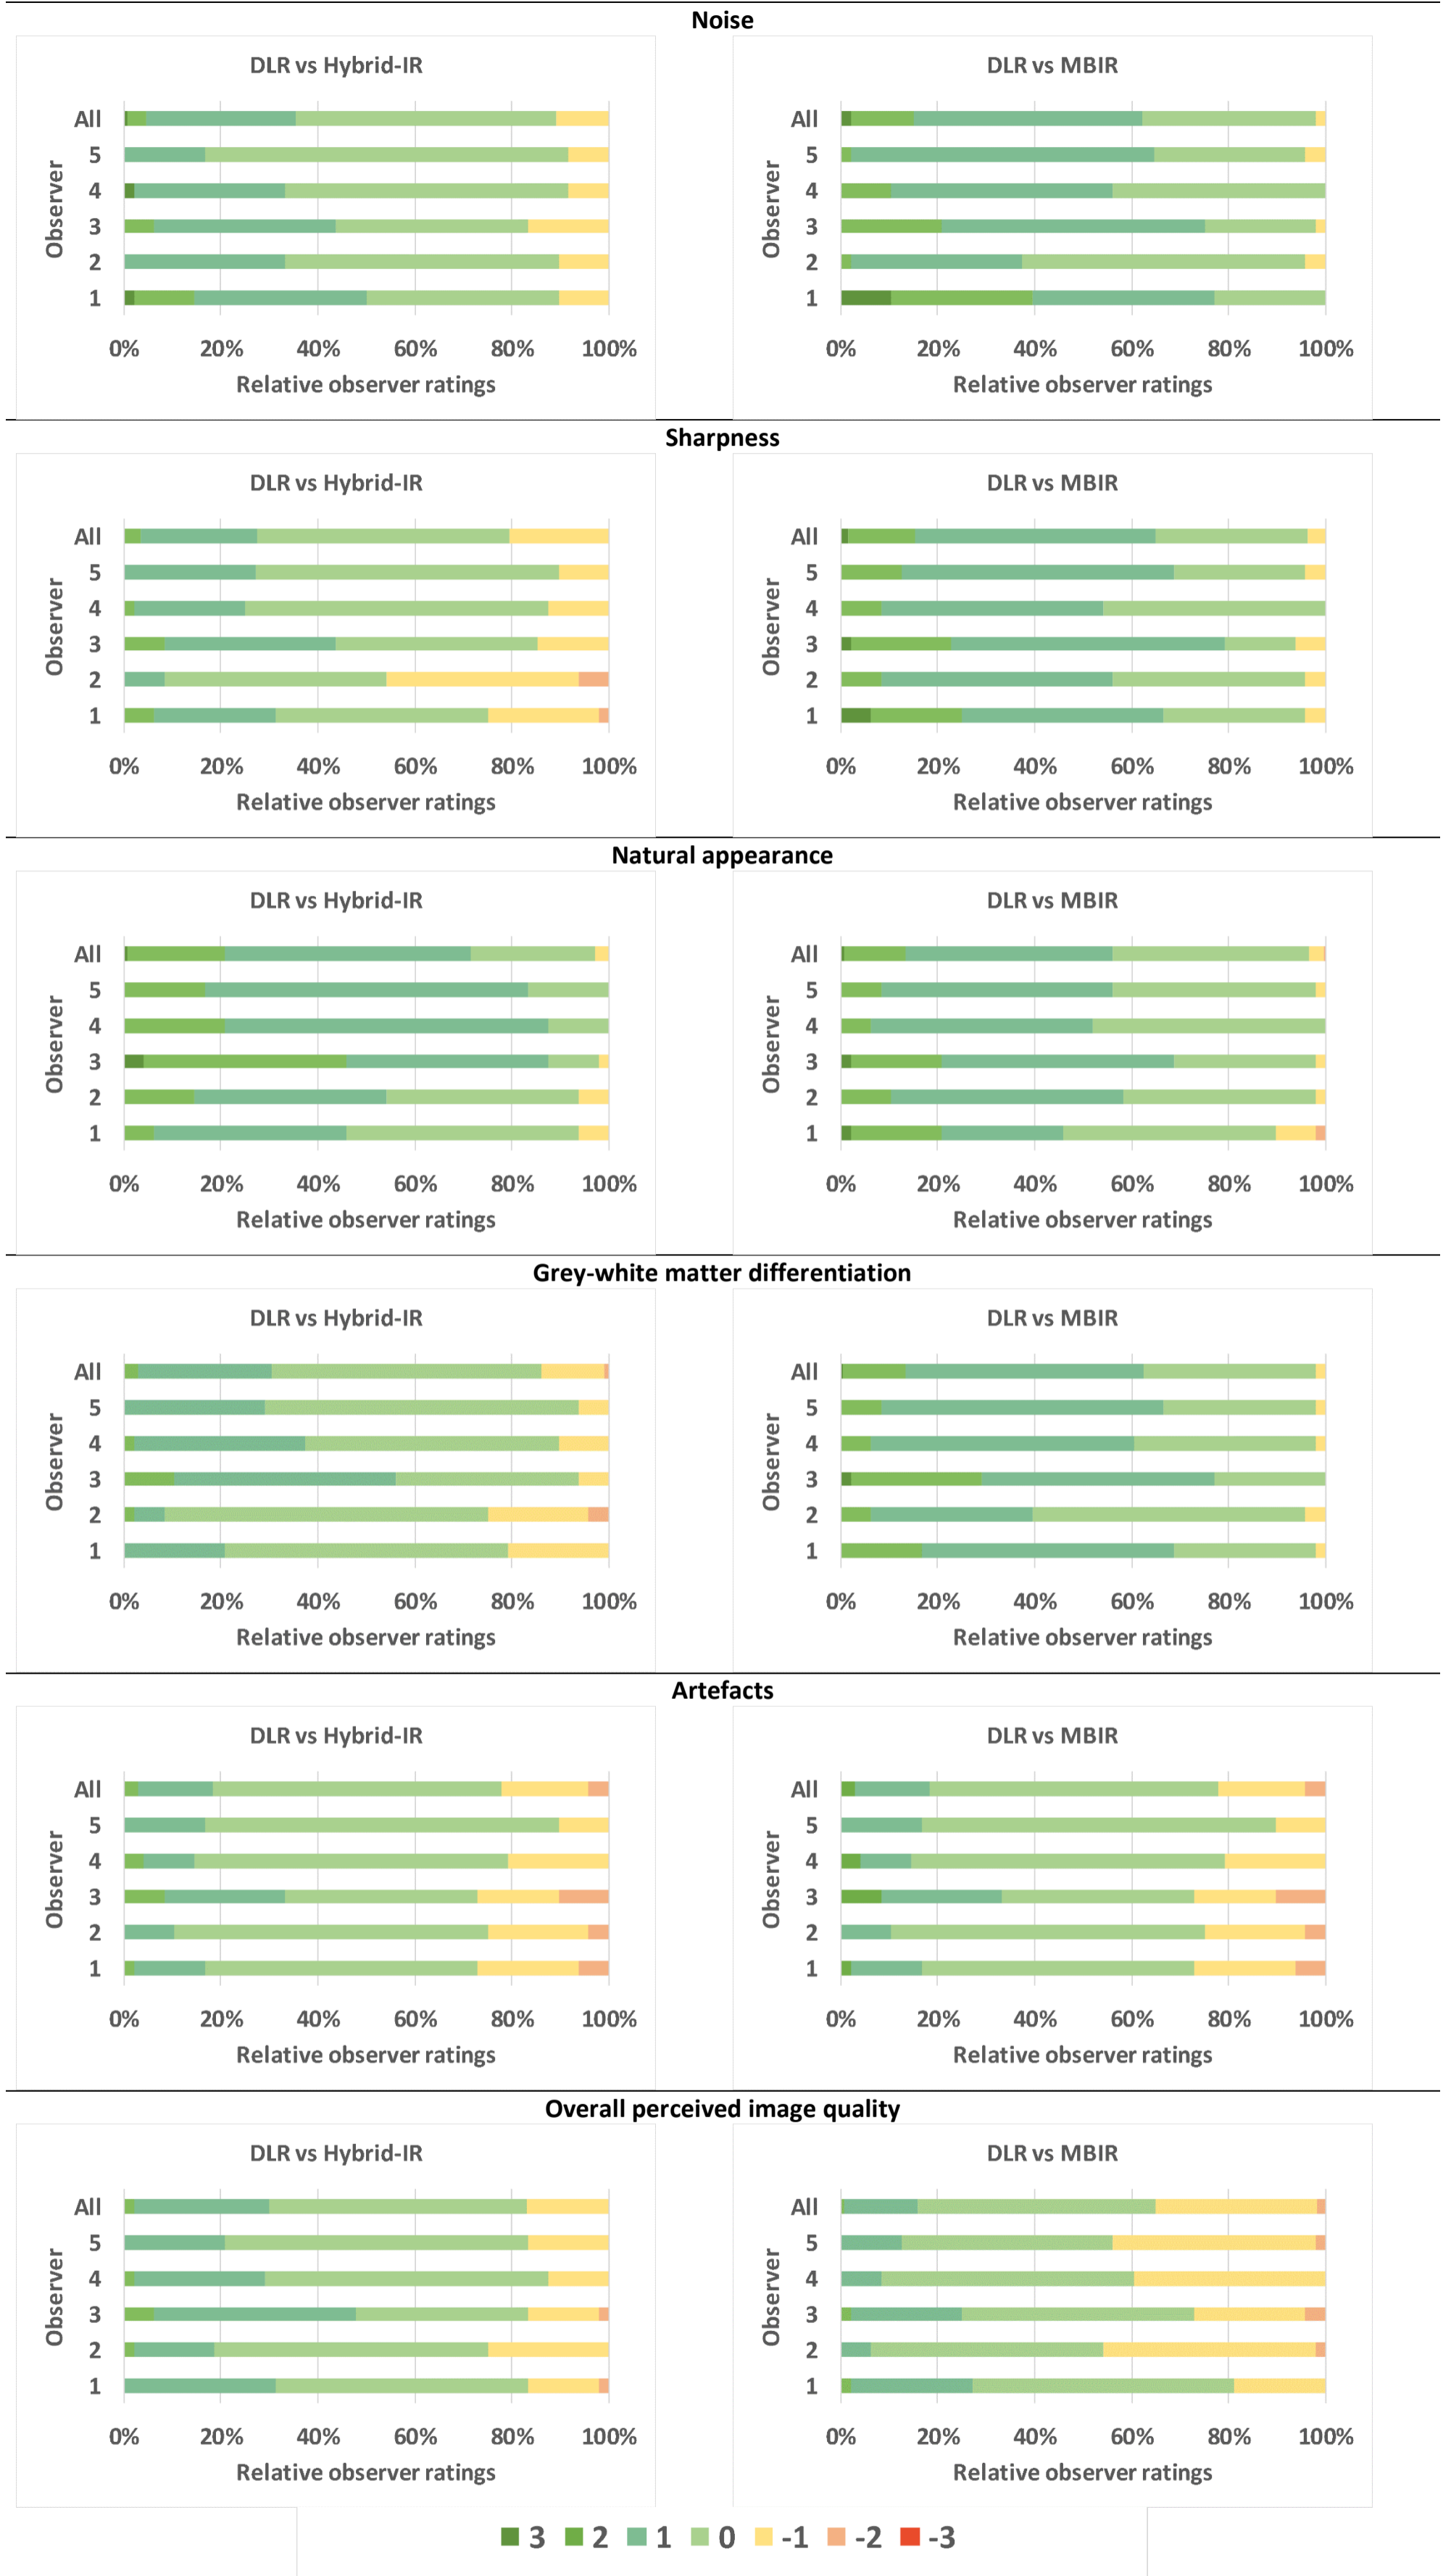

Relative ratings, the rating of DLR minus the rating of Hybrid-IR or MBIR, for each observer and all observers per image quality characteristic. Positive values mean that DLR is rated better, negative values mean that DLR is rated worse.
